# Supplementary material for: Luminescence, energy transfer and tunable color of Ce3+,Dy3+/Tb3+ doped BaZn2(PO4)2 phosphors
Source: Royal Society of Chemistry journal article supplement (doi:10.1039/c5nj03148f), 2016-01-01
Supplement: c5nj03148f1.pdf [file c5nj03148f1.pdf]

# Supplemental information

## Luminescence, energy transfer and tunable color of Ce<sup>3+</sup>, Dy<sup>3+</sup>/Tb<sup>3+</sup> doped BaZn<sub>2</sub>(PO<sub>4</sub>)<sub>2</sub> phosphors

Luxiang Wang,<sup>a</sup> Mengjiao Xu,<sup>a</sup> Hongyang Zhao<sup>a</sup> and Dianzeng Jia<sup>\*a</sup>

Key Laboratory of Material and Technology for Clean Energy, Ministry of Education,

Key Laboratory of Advanced Functional Materials, Autonomous Region, Institute of

Applied Chemistry, Xinjiang University, Urumqi 830046, Xinjiang, PR China

\*Corresponding author: \*E-mail: jdz@xju.edu.cn / jdz0991@gmail.com Tel.: +86-

991-8583083; Fax: +86-991-8588883

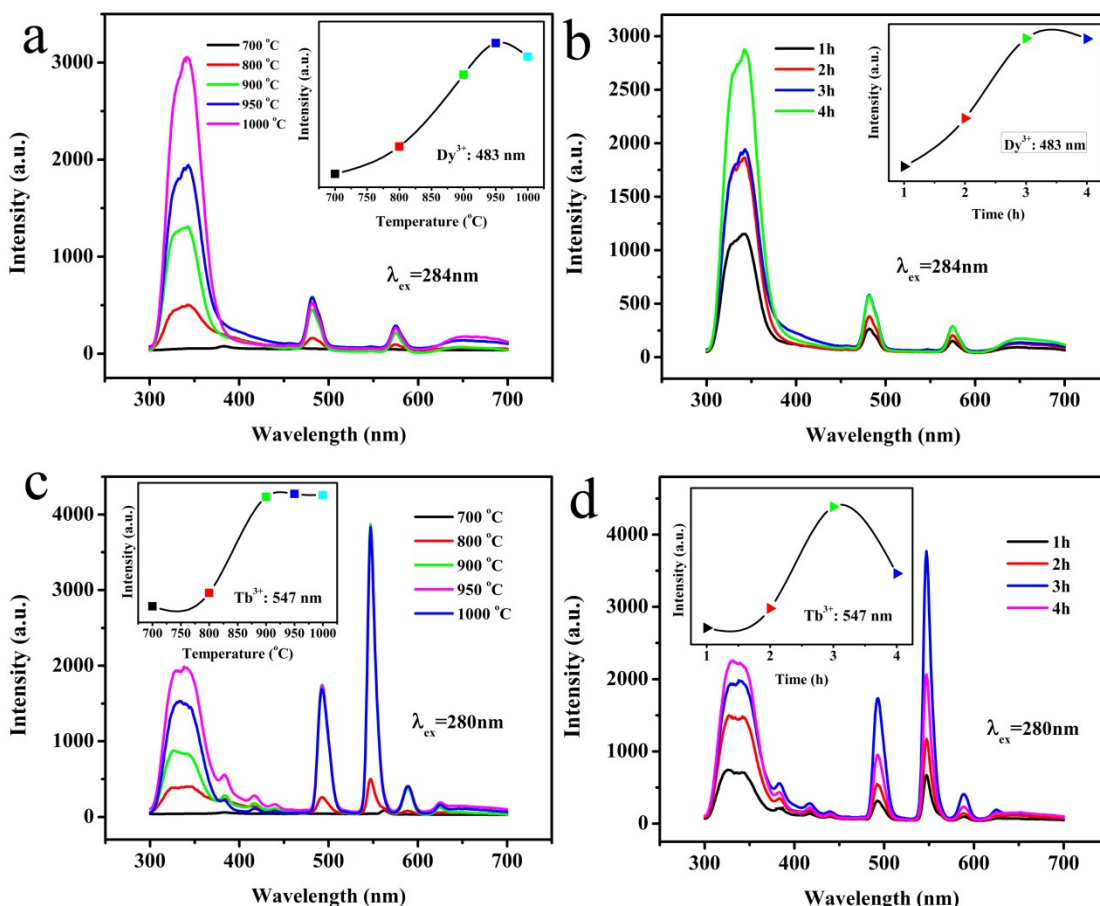

Fig. S1 Emission spectra of (a) BZPO: 0.04Ce<sup>3+</sup>, 0.0025Dy<sup>3+</sup>; (c) BZPO: 0.04Ce<sup>3+</sup>, 0.02Tb<sup>3+</sup> phosphor obtained at different calcination temperature; Emission spectra of (b) BZPO: 0.04Ce<sup>3+</sup>,

0.0025Dy<sup>3+</sup>; (d) BZPO: 0.04Ce<sup>3+</sup>, 0.02Tb<sup>3+</sup> phosphor obtained at different holding time when the calcination temperature fixed at 950°C.

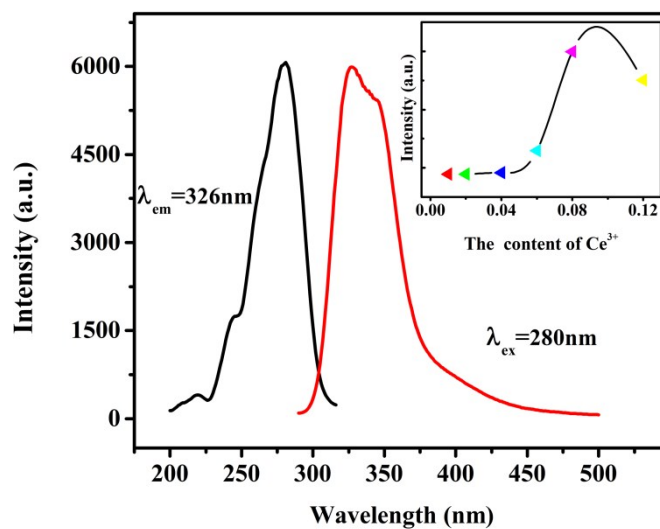

Fig. S2. Excitation and emission spectra of BZPO: 0.04Ce<sup>3+</sup> phosphor, Inset: photoluminescence intensities of BZPO: xCe<sup>3+</sup> (x=0.01~0.12) as a function of Ce<sup>3+</sup> contents.

Table S1 Ionic radii (r) for a given coordination number (CN) of Ba<sup>2+</sup>, Zn<sup>2+</sup>, P<sup>5+</sup>, Ce<sup>3+</sup>, Dy<sup>3+</sup>, and Tb<sup>3+</sup> ions.

| Ions             | Sites | Symmetry           | Coordination numbers (CN) | Ionic radius(Å) |
|------------------|-------|--------------------|---------------------------|-----------------|
| Ba <sup>2+</sup> | 4e    | P2 <sub>1</sub> /c | 7                         | 1.38            |
| Zn <sup>2+</sup> | 4e    | P2 <sub>1</sub> /c | 4                         | 0.60            |
| P <sup>5+</sup>  | 4e    | P2 <sub>1</sub> /c | 4                         | 0.17            |
| Ce <sup>3+</sup> | 4e    | P2 <sub>1</sub> /c | 7                         | 1.07            |
| Dy <sup>3+</sup> | 4e    | P2 <sub>1</sub> /c | 7                         | 0.97            |
| Tb <sup>3+</sup> | 4e    | P2 <sub>1</sub> /c | 7                         | 0.98            |
